# Supplementary material for: The SET Domain Proteins SUVH2 and SUVH9 Are Required for Pol V Occupancy at RNA-Directed DNA Methylation Loci
Source: PubMed Central journal article supplement (PMC3898904; doi:10.1371/journal.pgen.1003948), 2014-01-22

# Supplemental Figure S3

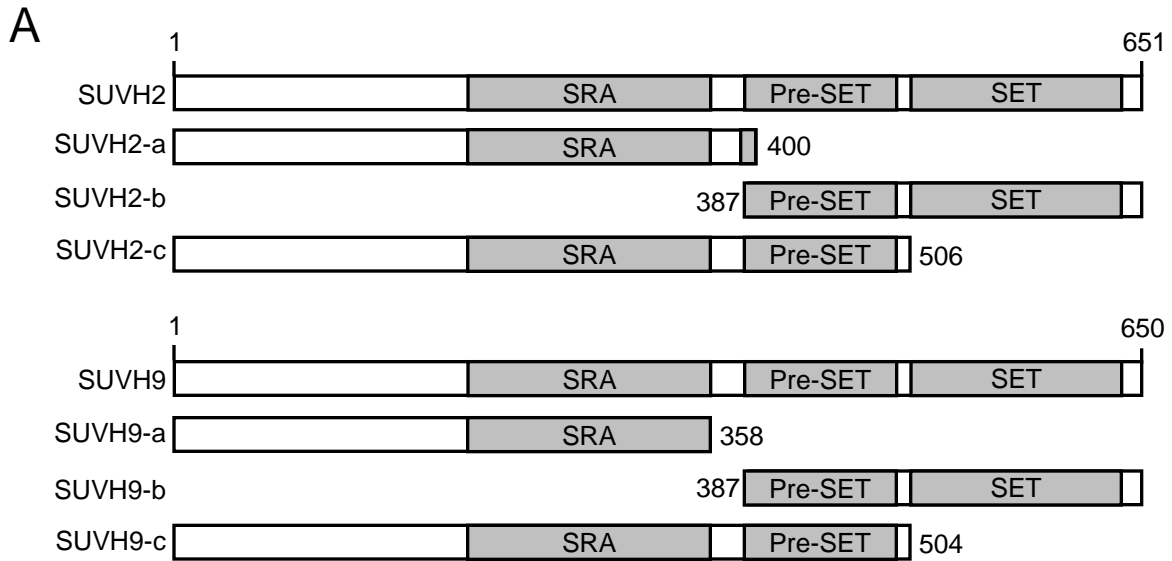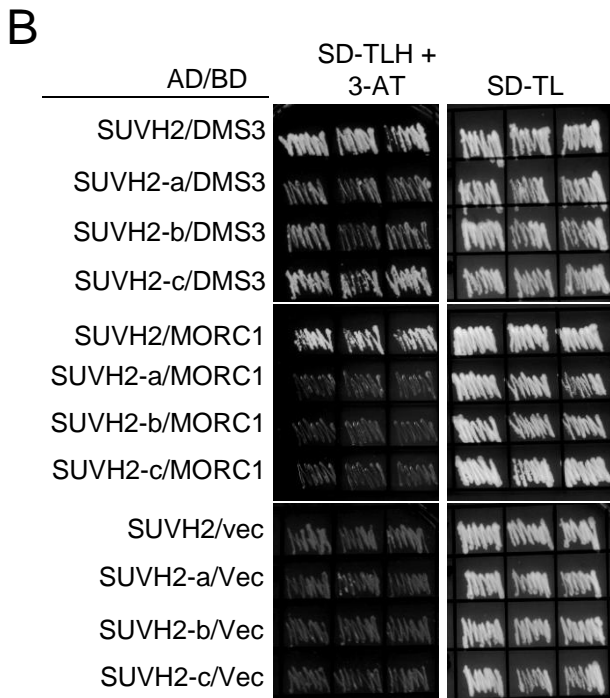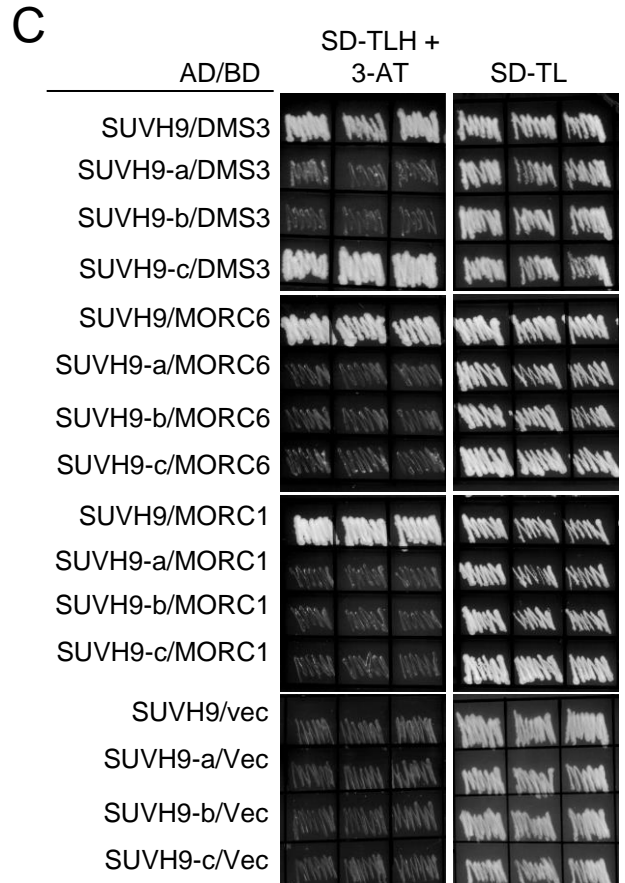

Supplement: pgen.1003948.s003.pdf [file pgen.1003948.s003.pdf]
