# Supplementary material for: The SET Domain Proteins SUVH2 and SUVH9 Are Required for Pol V Occupancy at RNA-Directed DNA Methylation Loci
Source: PubMed Central journal article supplement (PMC3898904; doi:10.1371/journal.pgen.1003948), 2014-01-22

# Supplemental Figure S6

A

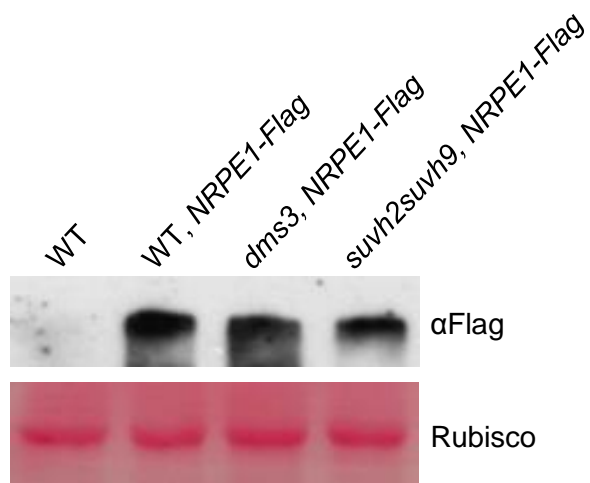

B

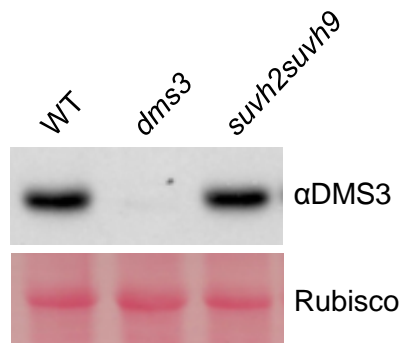

Supplement: pgen.1003948.s006.pdf [file pgen.1003948.s006.pdf]
